# Supplementary material
Source: publisher figshare collection journal article supplement (https://acs.figshare.com/ndownloader/files/25890983)
Supplement: Supplementary file 1 [file 25890983]

## Supporting Information

### **Exploring the Counteracting and Refolding Ability of Choline-Based Ionic Liquids Towards Crowding Environment-Induced Changes in HSA Structure**

Kavya Bhakuni,<sup>1</sup> Anamika Sindhu,<sup>1</sup> Meena Bisht,<sup>1</sup> and Pannuru Venkatesu\*<sup>1</sup>

<sup>1</sup>Department of Chemistry, University of Delhi, Delhi-110 007, India.

**\*Corresponding Author:** venkatesup@hotmail.com;

[pvenkatesu@chemistry.du.ac.in](mailto:pvenkatesu@chemistry.du.ac.in)

**This supporting information contains 1 scheme, 3 tables and 4 figures in 6 pages**

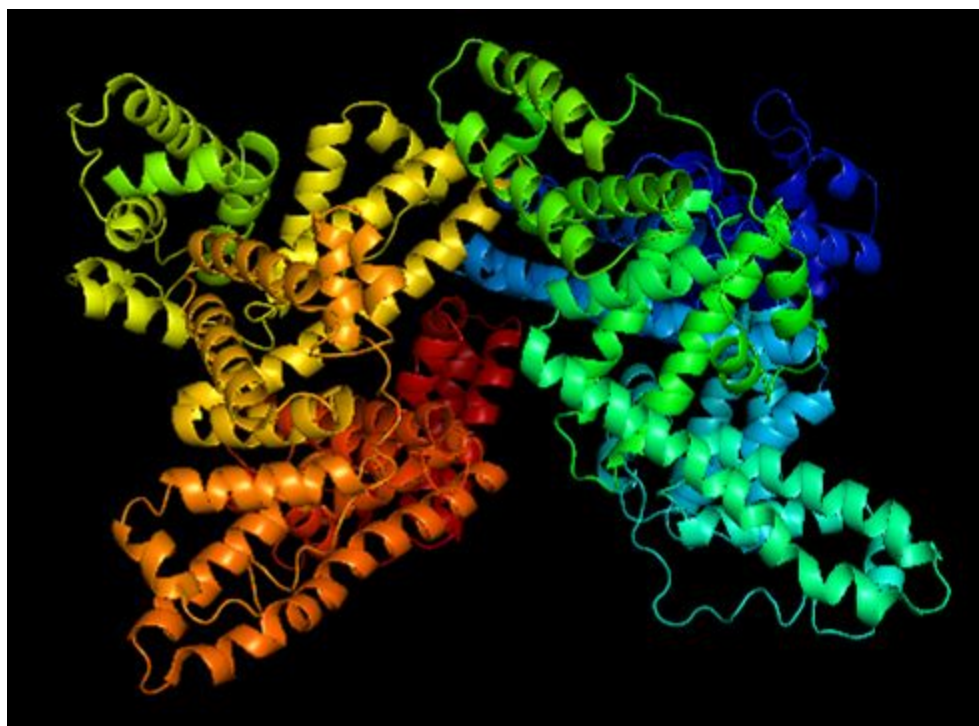

**Scheme S1.** Native structure of HSA depicted as a carton diagram which was obtained from protein data bank and reconstructed in by Pymol software.

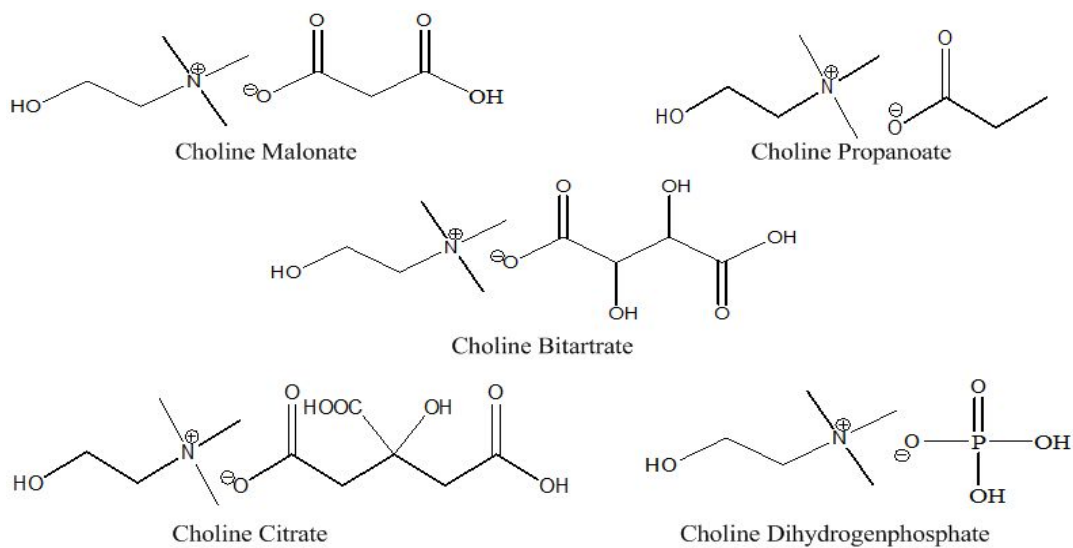

**Figure S1.** Chemical structure of cholinium-based ILs.

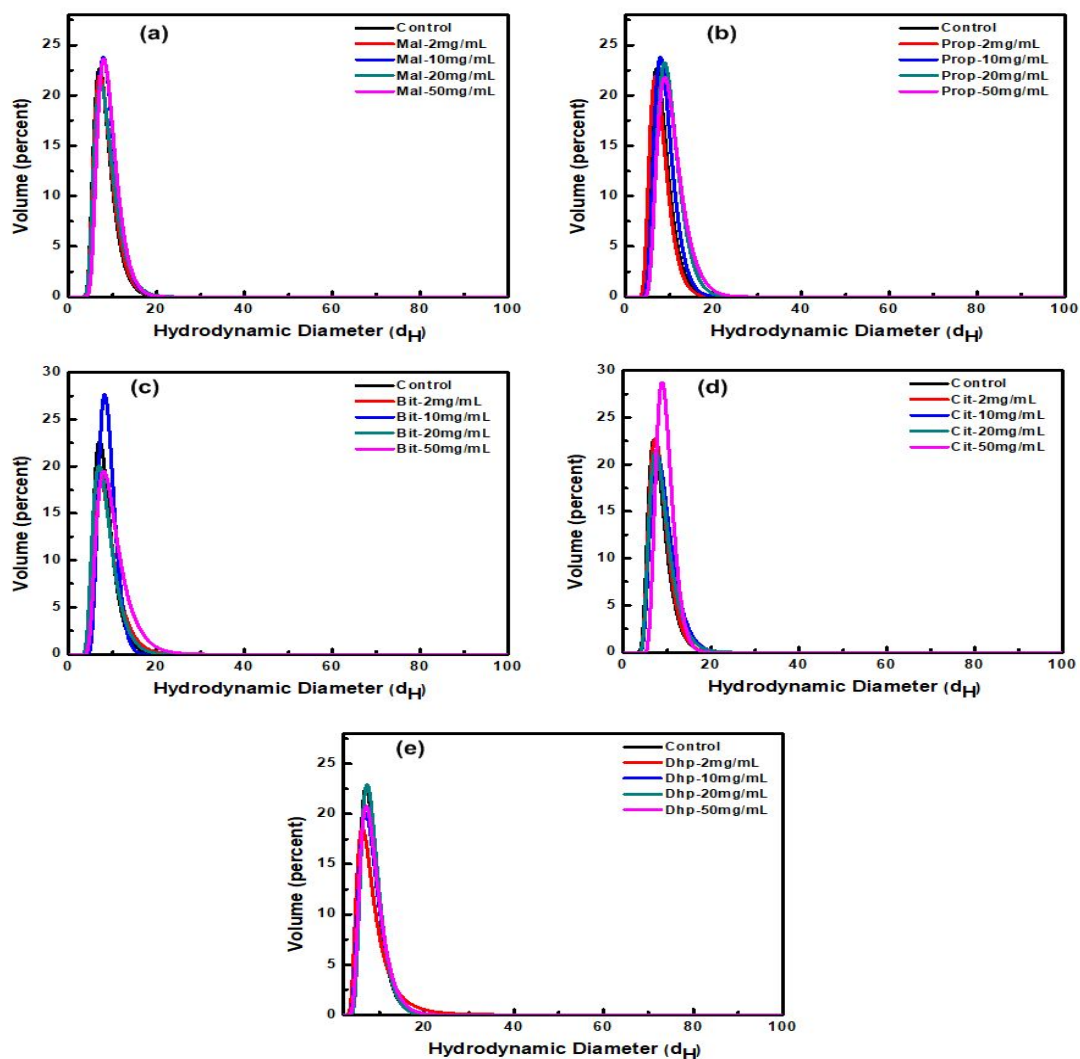

**Figure S2.** The hydrodynamic diameter ( $d_H$ ) of HSA at 25 °C in presence of varying concentration of different ILs.

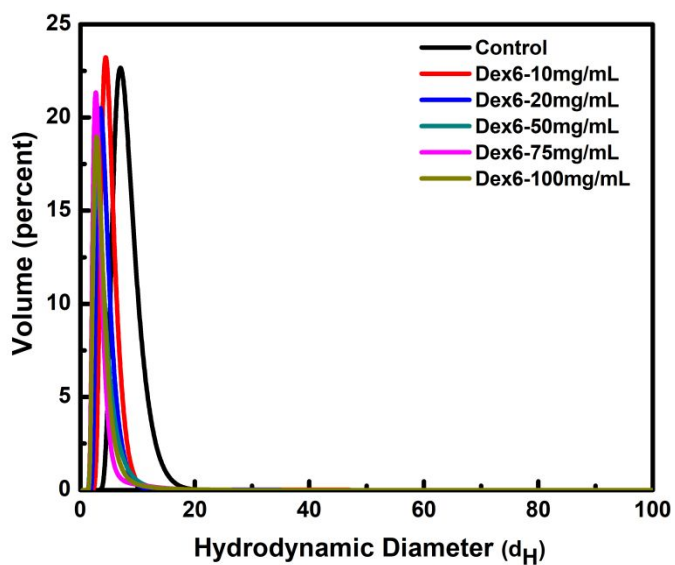

**Figure S3.** The hydrodynamic diameter ( $d_H$ ) of HSA at 25 °C in presence of varying concentration of dex6.

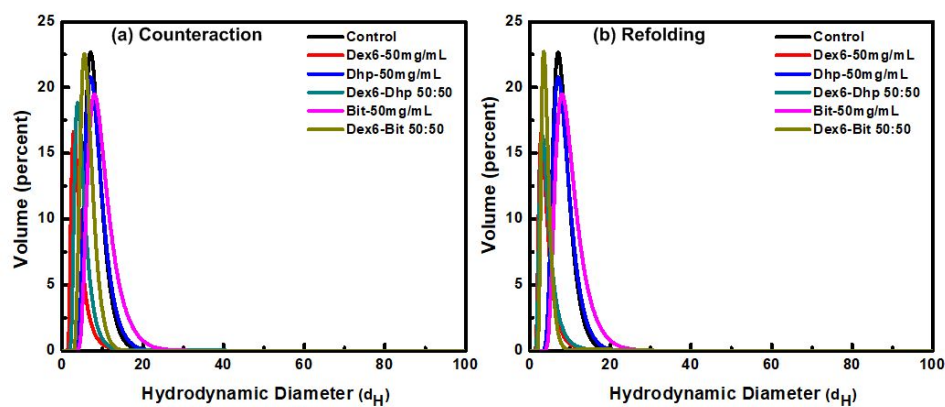

**Figure S4.** The hydrodynamic diameter ( $d_H$ ) of HSA at 25 °C (a) counteracting (b) refolding conditions in presence dex6 and ILs (Bit and Dhp).

**Table S1.** The  $d_H$  values of HSA in the presence of varying concentrations of different cholinium-based ILs.

| Concentration<br>(mg/mL) | $d_H$ values (nm) |      |     |     |     |
|--------------------------|-------------------|------|-----|-----|-----|
|                          | Mal               | Prop | Bit | Cit | Dhp |
| Control                  | 7.8               | 7.8  | 7.8 | 7.8 | 7.8 |
| 2                        | 7.8               | 7.3  | 7.8 | 7.6 | 7.4 |
| 10                       | 8.3               | 8.4  | 8.4 | 8.4 | 7.6 |
| 20                       | 8.0               | 9.4  | 7.7 | 8.2 | 7.8 |
| 50                       | 8.5               | 9.6  | 8.9 | 9.1 | 7.7 |

**Table S2.** The  $d_H$  and  $T_m$  values of HSA in absence and presence of dex6 as well as IL and combination of both under counteraction conditions phosphate buffer of pH 7.

| Sample   | $d_H$ (nm) | $T_m$ (°C) * |
|----------|------------|--------------|
| Control  | 7.8        | 66.23        |
| Dex6     | 3.5        | 61.26        |
| Dhp      | 7.7        | 61.92        |
| Dex6-Dhp | 4.4        | 67.85        |
| Bit      | 8.9        | 61.69        |
| Dex6-Bit | 5.9        | 63.57        |

\*Error value of  $T_m \pm 0.4$  °C

**Table S3.** The  $d_H$  and  $T_m$  values of HSA determined using DLS absence and presence of dex6 as well as IL and combination of both under refolding conditions in phosphate buffer of pH 7.

| Sample | $d_H$ (nm) | $T_m$ (°C) |
|--------|------------|------------|
|--------|------------|------------|

|                  |     |       |
|------------------|-----|-------|
| Control          | 7.8 | 66.23 |
| Dex6 (50 mg/mL)  | 3.5 | 61.26 |
| Dhp (50 mg/mL)   | 7.7 | 61.92 |
| Dex6-Dhp (50:50) | 3.8 | 67.44 |
| Bit (50 Mg/mL)   | 9.0 | 61.69 |
| Dex6-Bit (50:50) | 3.8 | 67.81 |

\*Error value of  $T_m \pm 0.4$  °C
